# Supplementary material
Source: PubMed Central journal article supplement (PMC4332844)

# Supplementary Figure 1

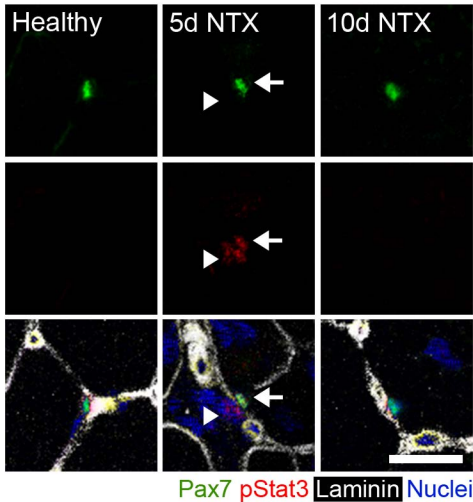

# Supplementary Figure 2

a

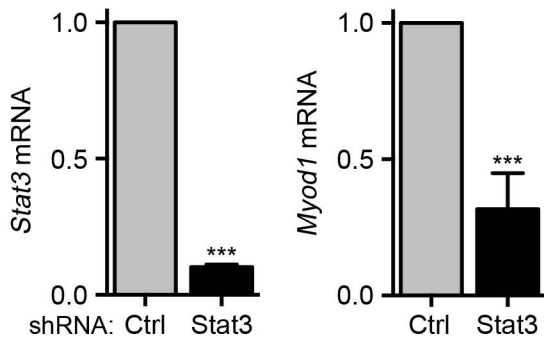

b

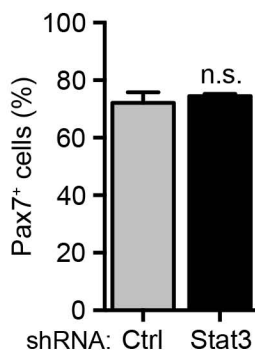

c

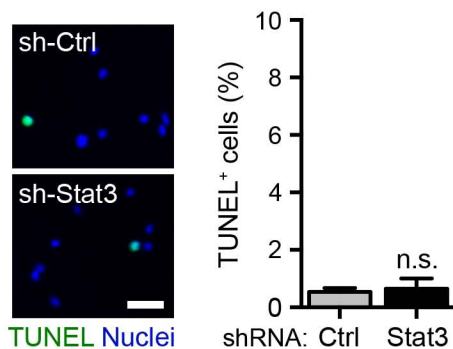

d

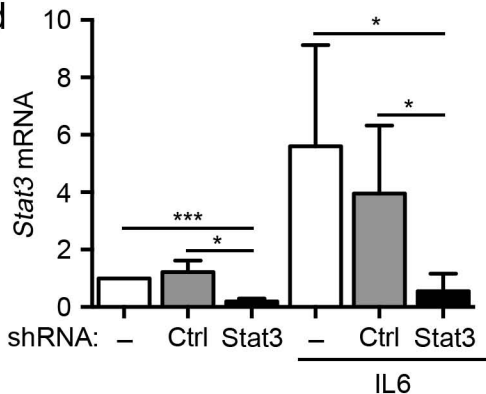

# Supplementary Figure 3

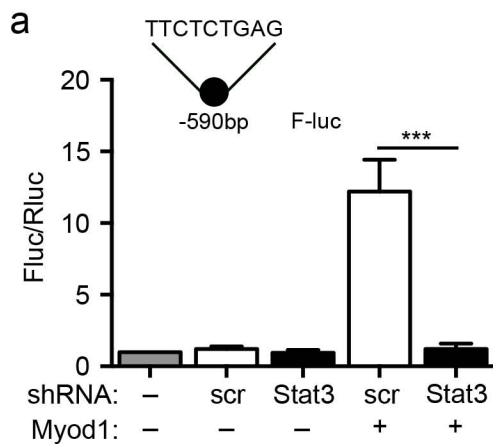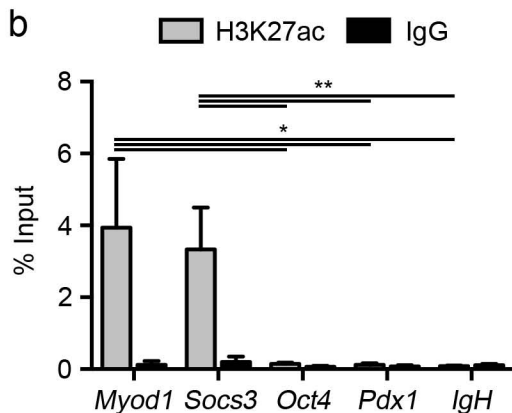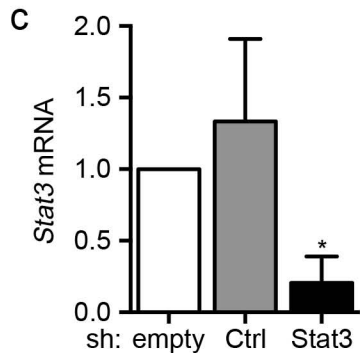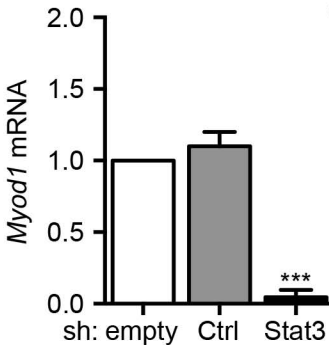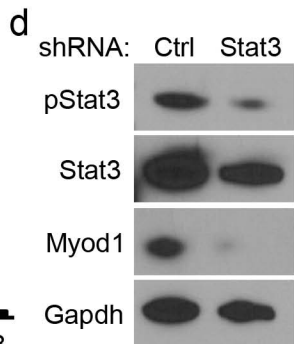

# Supplementary Figure 4

a

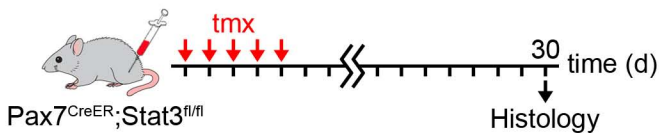

b

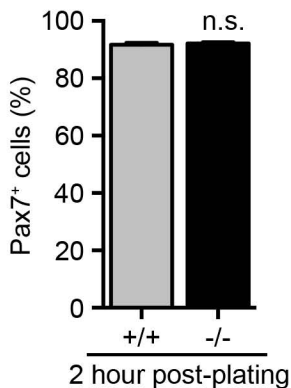

c

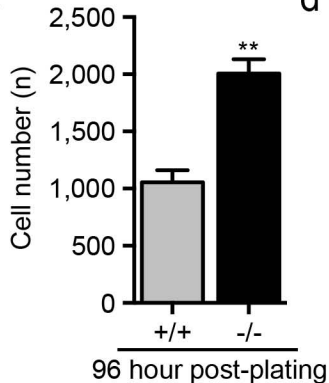

d

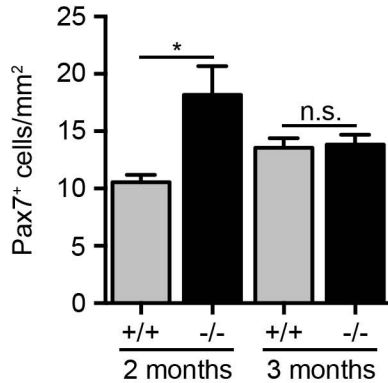

e

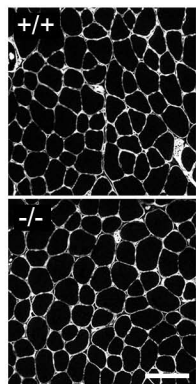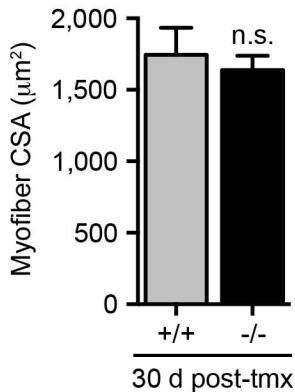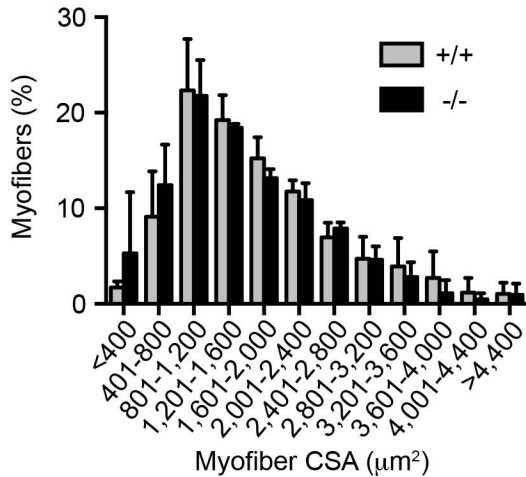

# Supplementary Figure 5

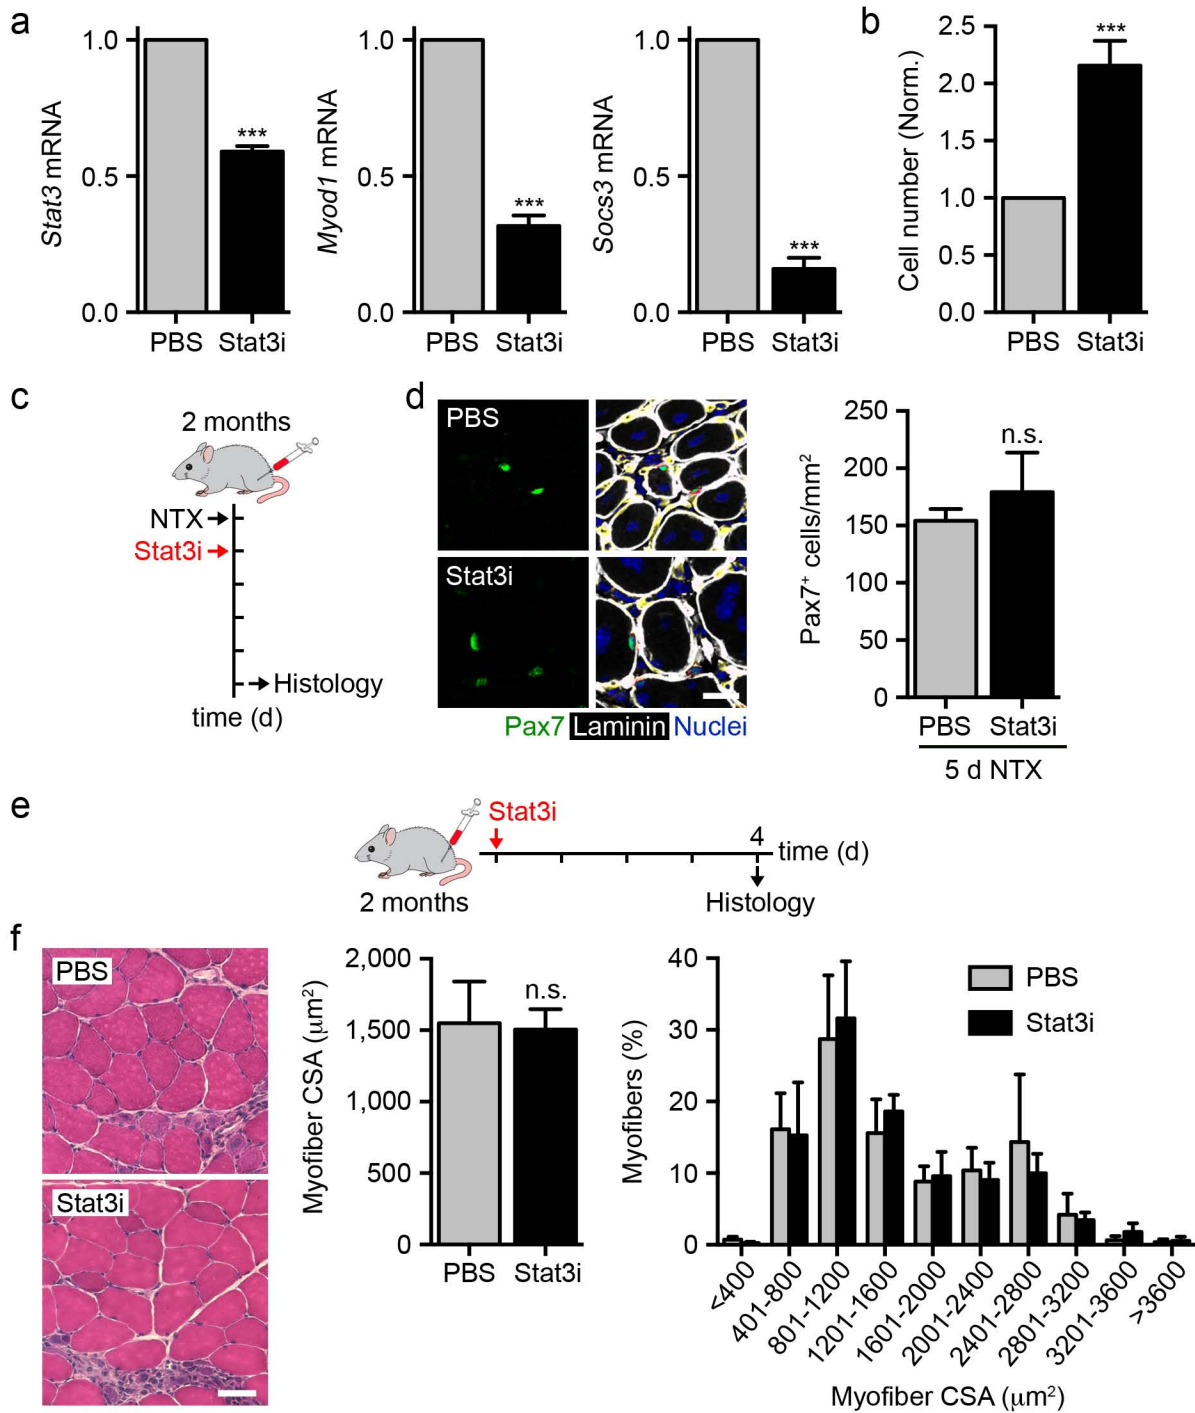

# Supplementary Figure 6

**a**

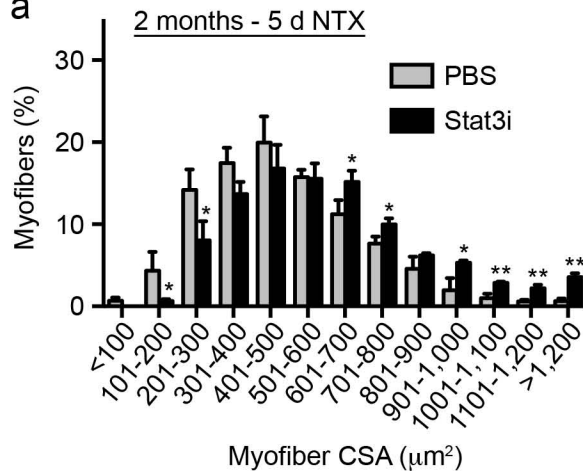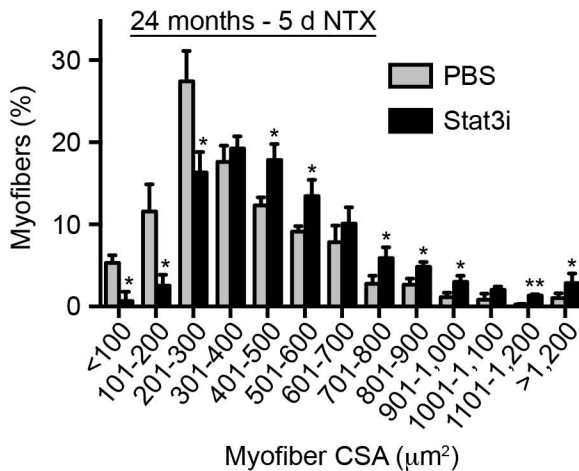

**b**

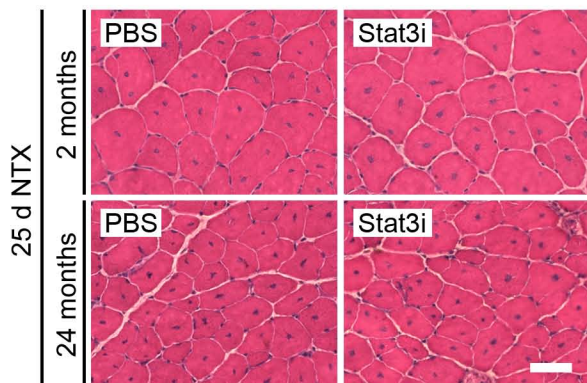

**c**

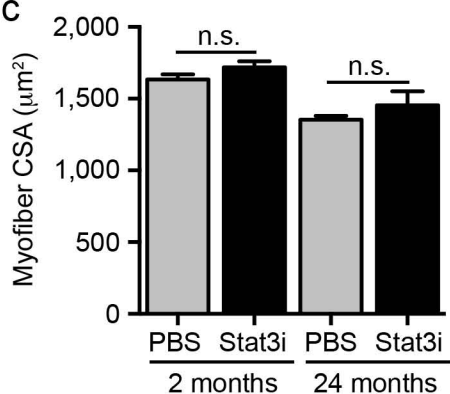

**d**

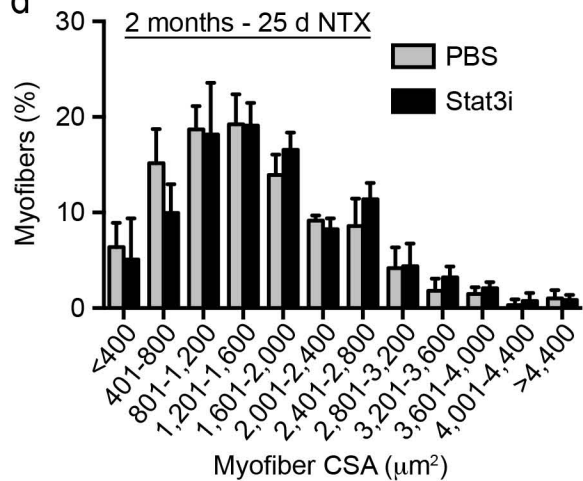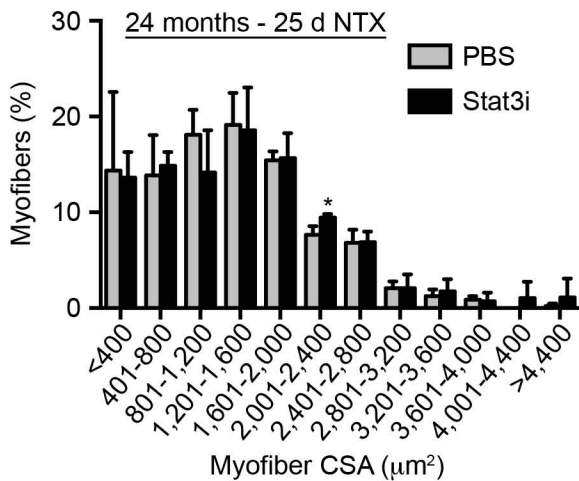

# Supplementary Figure 7

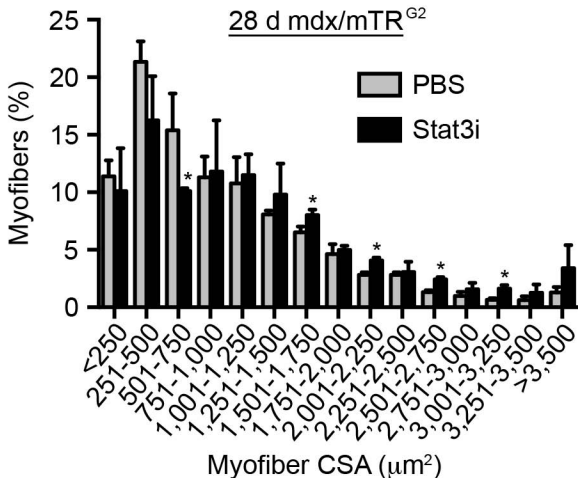

# Supplementary Figure 8

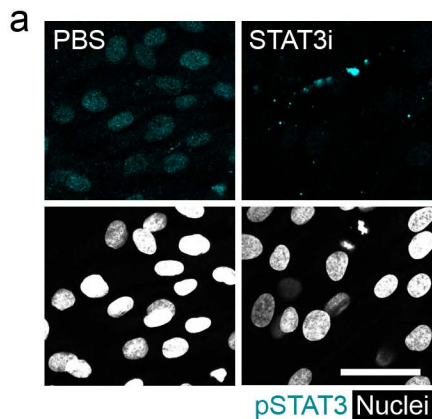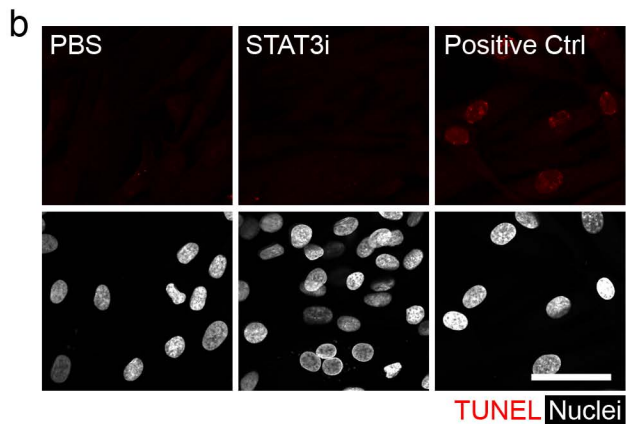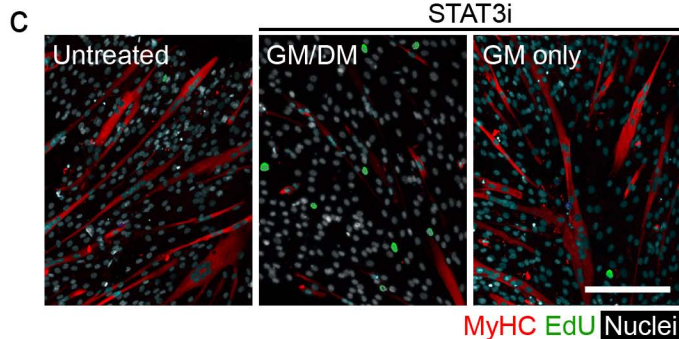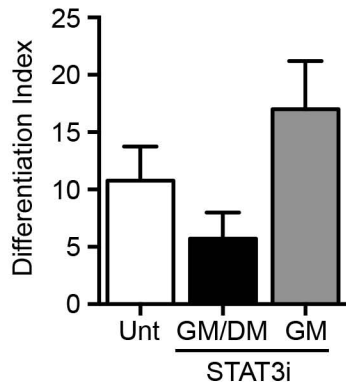

Supplement: NIHMS655753-supplement-01.pdf [file NIHMS655753-supplement-01.pdf]
